# Supplementary material for: Studies on crystal growth, vibrational, dielectric, electronic, mechanical and thermal properties of new organic nonlinear optical crystal: 3-nitrocinnamic acid
Source: Royal Society of Chemistry journal article supplement (doi:10.1039/c3ce41408f), 2013-01-01
Supplement: c3ce41408f.pdf [file c3ce41408f.pdf]

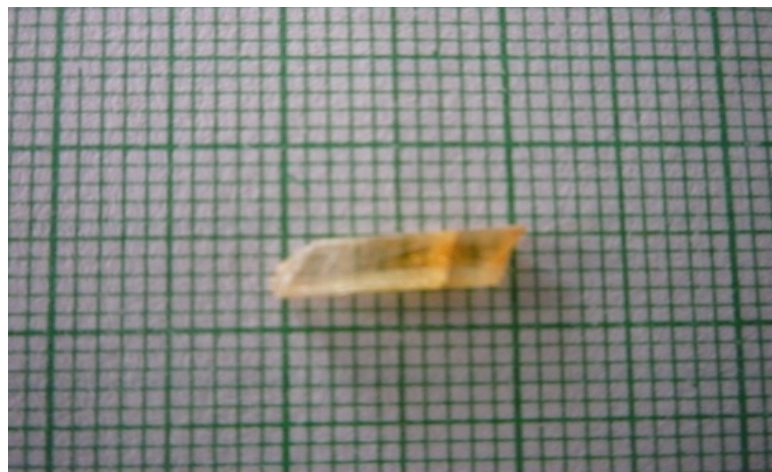

**Fig. S1 The grown crystal of 3NCA**

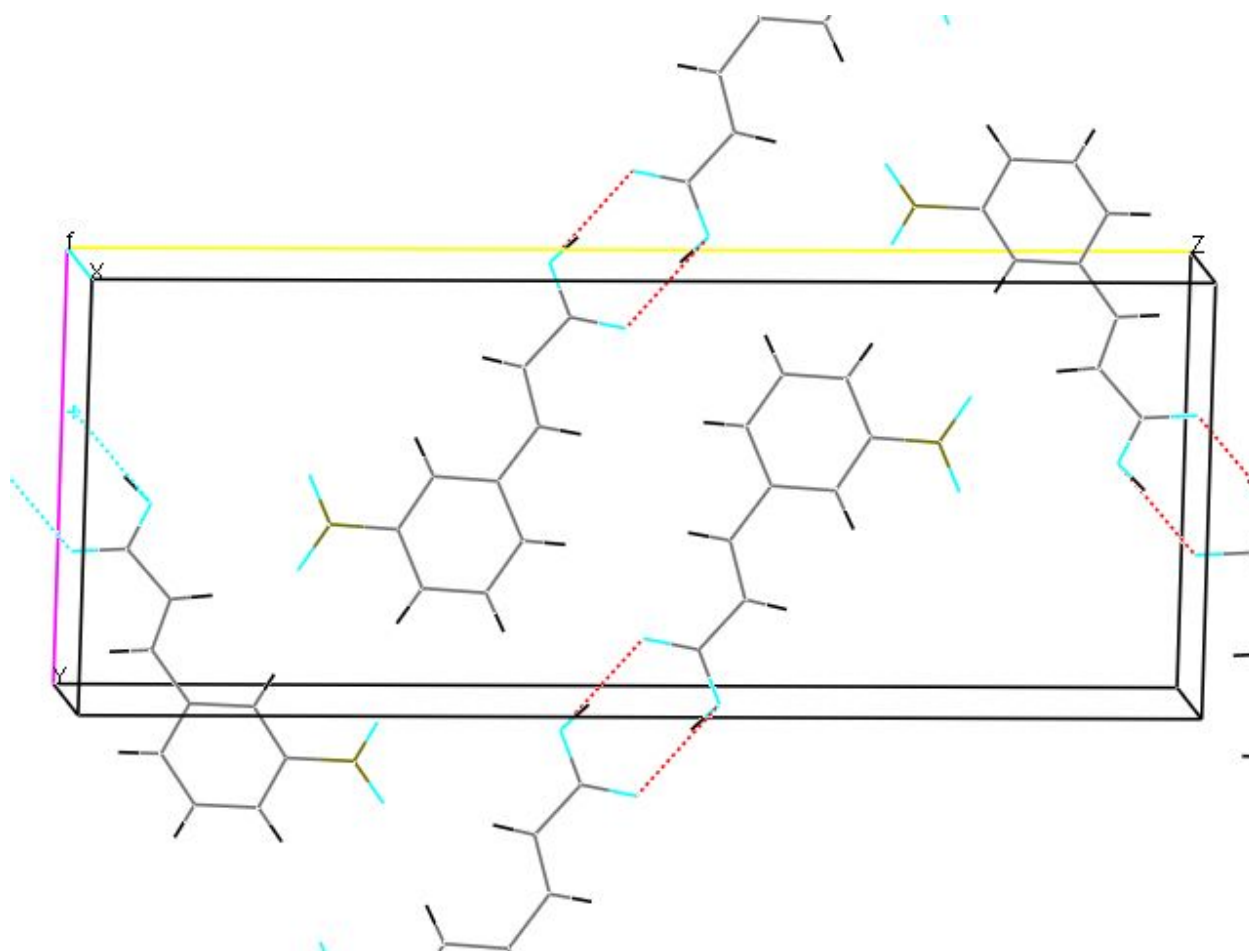

**Fig. S2** Crystal packing when viewed along the a-axis

### Crystal packing in 3nitrocinnamic acid

In the crystal, the independent 3nitrocinnamic acid molecules are linked by complimentary intermolecular O-H...O hydrogen bonds. Atom O<sub>20</sub> acts as a hydrogen bond donor to carbonyl atom O<sub>19</sub> of another 3nitrocinnamic acidmolecule (-x+1, -y-1, -z). The D...A distance being 2.636(3) Å and the D-H...A angle of 169°. This hydrogen bonding interaction leads to the formation of centrosymmetric dimers with a graph set notation of R<sub>2</sub><sup>2</sup>(8). The packing diagram exhibits stacking of such dimers along the crystallographic a axis.

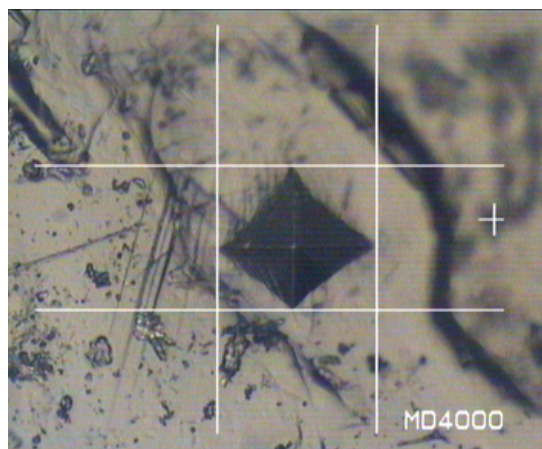

**Fig.S3** Indentation mark for 10gm

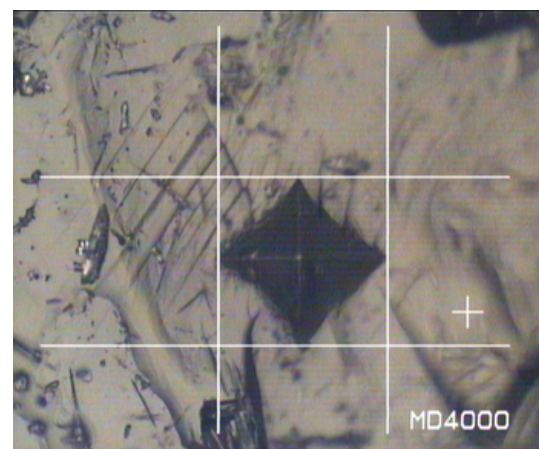

**Fig.S4** Indentation mark for 30 gm

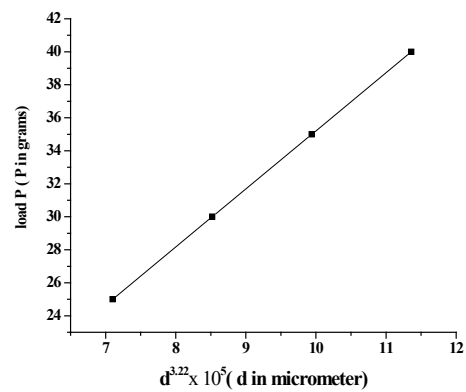

**Fig. S5** load P Vs  $d^n$

**Table S1. Optimized geometrical parameters of 3NCA**

| Bond Length (Å)                  |          |       |       | Bond Angle(°)                                     |          |        |        | Dihedral Angle(°)                                                      |             |             |             |
|----------------------------------|----------|-------|-------|---------------------------------------------------|----------|--------|--------|------------------------------------------------------------------------|-------------|-------------|-------------|
| Parameter                        | Mono mer | Dimer | Exp.  | Parameter                                         | Mono mer | Dimer  | Exp.   | Parameter                                                              | Mono mer    | Dimer       | Exp.        |
| C <sub>1</sub> -C <sub>2</sub>   | 1.407    | 1.407 | 1.389 | C <sub>1</sub> -C <sub>2</sub> -H <sub>3</sub>    | 122.10   | 122.13 | 120.52 | C <sub>9</sub> -C <sub>1</sub> -C <sub>2</sub> -C <sub>4</sub>         | 0.003       | -0.004      | 0.98        |
| C <sub>2</sub> -H <sub>3</sub>   | 1.088    | 1.088 | 0.930 | C <sub>1</sub> -C <sub>2</sub> -C <sub>4</sub>    | 119.36   | 119.35 | 118.80 | C <sub>1</sub> -C <sub>2</sub> -C <sub>4</sub> -C <sub>5</sub>         | -0.002      | 0.001       | -0.86       |
| C <sub>2</sub> -C <sub>4</sub>   | 1.389    | 1.388 | 1.368 | C <sub>2</sub> -C <sub>4</sub> -C <sub>5</sub>    | 122.65   | 122.65 | 123.26 | C <sub>2</sub> -C <sub>4</sub> -C <sub>5</sub> -H <sub>6</sub>         | 179.99      | 179.99      | 179.97      |
| C <sub>4</sub> -C <sub>5</sub>   | 1.397    | 1.397 | 1.381 | C <sub>4</sub> -C <sub>5</sub> -H <sub>6</sub>    | 119.46   | 119.46 | 121.20 | C <sub>2</sub> -C <sub>4</sub> -C <sub>5</sub> -C <sub>7</sub>         | 0.00        | 0.002       | -0.06       |
| C <sub>5</sub> -H <sub>6</sub>   | 1.088    | 1.088 | 0.930 | C <sub>4</sub> -C <sub>5</sub> -C <sub>7</sub>    | 118.08   | 118.09 | 117.70 | C <sub>4</sub> -C <sub>5</sub> -C <sub>7</sub> -H <sub>8</sub>         | -<br>179.99 | 179.99      | 179.22      |
| C <sub>5</sub> -C <sub>7</sub>   | 1.394    | 1.394 | 1.378 | C <sub>5</sub> -C <sub>7</sub> -H <sub>8</sub>    | 119.79   | 119.78 | 119.83 | C <sub>4</sub> -C <sub>5</sub> -C <sub>7</sub> -C <sub>9</sub>         | 0.001       | -0.001      | 0.83        |
| C <sub>7</sub> -H <sub>8</sub>   | 1.091    | 1.091 | 0.929 | C <sub>5</sub> -C <sub>7</sub> -C <sub>9</sub>    | 120.23   | 120.22 | 120.37 | C <sub>5</sub> -C <sub>7</sub> -C <sub>9</sub> -H <sub>10</sub>        | 179.99      | 179.99      | 179.30      |
| C <sub>7</sub> -C <sub>9</sub>   | 1.396    | 1.396 | 1.366 | C <sub>7</sub> -C <sub>9</sub> -H <sub>10</sub>   | 119.65   | 119.65 | 119.18 | H <sub>3</sub> -C <sub>2</sub> -C <sub>4</sub> -N <sub>11</sub>        | -0.003      | 0.003       | 0.09        |
| C <sub>9</sub> -H <sub>10</sub>  | 1.092    | 1.092 | 0.929 | C <sub>2</sub> -C <sub>4</sub> -N <sub>11</sub>   | 118.58   | 118.57 | 118.87 | C <sub>4</sub> -C <sub>2</sub> -C <sub>1</sub> -C <sub>12</sub>        | -<br>179.99 | 179.99      | -<br>179.56 |
| C <sub>4</sub> -N <sub>11</sub>  | 1.483    | 1.483 | 1.471 | C <sub>2</sub> -C <sub>1</sub> -C <sub>12</sub>   | 122.75   | 122.73 | 122.06 | C <sub>2</sub> -C <sub>1</sub> -C <sub>12</sub> -H <sub>13</sub>       | -<br>179.98 | 179.92      | 179.40      |
| C <sub>1</sub> -C <sub>12</sub>  | 1.465    | 1.465 | 1.463 | C <sub>1</sub> -C <sub>12</sub> -H <sub>13</sub>  | 116.18   | 116.16 | 115.92 | C <sub>2</sub> -C <sub>1</sub> -C <sub>12</sub> -C <sub>14</sub>       | 0.01        | -0.09       | -0.60       |
| C <sub>12</sub> -H <sub>13</sub> | 1.095    | 1.095 | 0.929 | C <sub>1</sub> -C <sub>12</sub> -C <sub>14</sub>  | 127.5    | 127.36 | 128.09 | H <sub>13</sub> -C <sub>12</sub> -C <sub>14</sub> -<br>H <sub>15</sub> | 179.99      | 179.99      | 179.55      |
| C <sub>12</sub> -C <sub>14</sub> | 1.345    | 1.346 | 1.322 | C <sub>12</sub> -C <sub>14</sub> -H <sub>15</sub> | 123.41   | 123.41 | 118.96 | H <sub>13</sub> -C <sub>12</sub> -C <sub>14</sub> -<br>C <sub>16</sub> | -0.00       | -0.01       | -0.45       |
| C <sub>14</sub> -H <sub>15</sub> | 1.091    | 1.091 | 0.980 | C <sub>12</sub> -C <sub>14</sub> -C <sub>16</sub> | 119.68   | 120.53 | 122.17 | C <sub>2</sub> -C <sub>4</sub> -N <sub>11</sub> -O <sub>17</sub>       | -<br>179.98 | 179.99      | 171.97      |
| C <sub>14</sub> -C <sub>16</sub> | 1.480    | 1.478 | 1.459 | C <sub>4</sub> -N <sub>11</sub> -O <sub>17</sub>  | 117.43   | 117.33 | 118.30 | C <sub>2</sub> -C <sub>4</sub> -N <sub>11</sub> -O <sub>18</sub>       | 0.02        | 0.002       | 8.57        |
| N <sub>11</sub> -O <sub>17</sub> | 1.224    | 1.224 | 1.218 | C <sub>4</sub> -N <sub>11</sub> -O <sub>18</sub>  | 117.53   | 117.51 | 118.43 | H <sub>15</sub> -C <sub>14</sub> -C <sub>16</sub> -                    | -<br>179.99 | -<br>179.99 | 177.44      |

|                                  |       |       |       |                                                   |        |        |        |                                                                        |        |        |       |
|----------------------------------|-------|-------|-------|---------------------------------------------------|--------|--------|--------|------------------------------------------------------------------------|--------|--------|-------|
|                                  |       |       |       |                                                   |        |        |        | O <sub>19</sub>                                                        |        |        |       |
| N <sub>11</sub> -O <sub>18</sub> | 1.225 | 1.225 | 1.212 | C <sub>14</sub> -C <sub>16</sub> -O <sub>19</sub> | 126.03 | 122.75 | 120.68 | H <sub>15</sub> -C <sub>14</sub> -C <sub>16</sub> -<br>O <sub>20</sub> | 0.006  | -0.001 | -2.01 |
| C <sub>16</sub> -O <sub>19</sub> | 1.214 | 1.237 | 1.244 | C <sub>14</sub> -C <sub>16</sub> -O <sub>20</sub> | 111.20 | 112.93 | 115.69 | O <sub>19</sub> -C <sub>16</sub> -O <sub>20</sub> -<br>H <sub>21</sub> | -0.001 | -0.059 | -2.90 |
| C <sub>16</sub> -O <sub>20</sub> | 1.355 | 1.319 | 1.278 | C <sub>16</sub> -O <sub>20</sub> -H <sub>21</sub> | 105.91 | 110.03 | 109.49 |                                                                        |        |        |       |
| O <sub>20</sub> -H <sub>21</sub> | 0.974 | 1.012 | 0.820 |                                                   |        |        |        |                                                                        |        |        |       |

**Table S2. Experimental and calculated absorption wavelengths, energies and oscillator strengths of 3NCA using the TD-DFT method at the B3LYP/cc-pvdz and BHLYP/cc-pvdz level**

| Excitation     | CI expansion coefficient | Wavelength (nm) Calc. gas phase | Oscillator strength ( <i>f</i> ) | Excitation     | CI expansion coefficient | Wavelength (nm) Calc. ethanol B3LYP/cc-pvdz | Oscillator strength ( <i>f</i> ) | Excitation     | CI expansion coefficient | Wavelength (nm) Calc. ethanol BHLYP | Oscillator strength ( <i>f</i> ) | Expt. (nm) |
|----------------|--------------------------|---------------------------------|----------------------------------|----------------|--------------------------|---------------------------------------------|----------------------------------|----------------|--------------------------|-------------------------------------|----------------------------------|------------|
| Excited state1 | Singlet A                |                                 |                                  | Excited state1 | Singlet A                |                                             |                                  | Excited state1 | Singlet A                |                                     |                                  |            |
| 47 → 51        | 0.65951                  |                                 |                                  | 48 → 52        | -0.11850                 |                                             |                                  | 45 → 51        | -0.64248                 |                                     | 0.0000                           |            |
| 47 → 52        | -0.21927                 | 324.50                          | 0.0000                           | 50 → 51        | 0.67757                  | 335.44                                      | 0.0170                           | 45 → 52        | -0.17808                 | 287.36                              |                                  |            |
| 47 → 53        | 0.10476                  |                                 |                                  | 50 → 52        | 0.12637                  |                                             |                                  | 45 → 53        | -0.17649                 |                                     |                                  |            |
|                |                          |                                 |                                  |                |                          |                                             |                                  | 45 → 54        | -0.13867                 |                                     |                                  |            |

|                |           |        |        |                |           |        |        |                |           |        |        |     |
|----------------|-----------|--------|--------|----------------|-----------|--------|--------|----------------|-----------|--------|--------|-----|
| Excited state2 | Singlet A |        |        | Excited state2 | Singlet A |        |        | Excited state2 | Singlet A |        |        |     |
| 48 → 51        | 0.11714   | 320.04 | 0.0129 | 47 → 51        | 0.68872   | 315.46 | 0.0000 | 49 -> 51       | -0.14866  |        |        |     |
| 48 → 52        | 0.13375   |        |        | 47 → 52        | 0.11237   |        |        | 49 -> 52       | 0.17241   | 278.59 | 0.0212 | 261 |
| 50 → 51        | 0.63601   |        |        |                |           |        |        | 50 -> 51       | -0.63071  |        |        |     |
| 50 → 52        | -0.24472  |        |        |                |           |        |        | 50 -> 52       | -0.16601  |        |        |     |
| Excited state3 | Singlet A |        |        | Excited state3 | Singlet A |        |        | Excited state3 | Singlet A |        |        |     |
| 49 → 51        | 0.32658   |        |        |                |           |        |        | 43 -> 51       | 0.63899   |        |        |     |
| 49 → 52        | 0.61076   | 296.28 | 0.0000 | 49 → 51        | -0.21175  | 284.03 | 0.0000 | 43 -> 52       | 0.17611   | 259.39 | 0.0000 |     |
| 49 → 54        | 0.10018   |        |        | 49 → 52        | 0.65877   |        |        | 43 -> 53       | 0.16492   |        |        |     |
|                |           |        |        | 49 → 54        | -0.10441  |        |        | 43 -> 54       | 0.12962   |        |        |     |



**Table S3: Definition of internal co-ordinates of 3NCA**

| No.               | Symbol         | Type          | Definition                                                                                                                                                                                                                                                                                                                                                                                                                                                                                                                                                                                                                                                 |
|-------------------|----------------|---------------|------------------------------------------------------------------------------------------------------------------------------------------------------------------------------------------------------------------------------------------------------------------------------------------------------------------------------------------------------------------------------------------------------------------------------------------------------------------------------------------------------------------------------------------------------------------------------------------------------------------------------------------------------------|
| <b>Stretching</b> |                |               |                                                                                                                                                                                                                                                                                                                                                                                                                                                                                                                                                                                                                                                            |
| 1-8               | Ri             | C-H (ring)    | C <sub>2</sub> -H <sub>3</sub> , C <sub>5</sub> -H <sub>6</sub> , C <sub>7</sub> -H <sub>8</sub> , C <sub>9</sub> -H <sub>10</sub> , C <sub>20</sub> -H <sub>21</sub> , C <sub>23</sub> -H <sub>24</sub> ,<br>C <sub>25</sub> -H <sub>26</sub> , C <sub>27</sub> -H <sub>28</sub> .                                                                                                                                                                                                                                                                                                                                                                        |
| 9-12              | Ri             | C-H (SUB)     | C <sub>12</sub> -H <sub>13</sub> , C <sub>14</sub> -H <sub>15</sub> , C <sub>30</sub> -H <sub>31</sub> , C <sub>32</sub> -H <sub>33</sub> .                                                                                                                                                                                                                                                                                                                                                                                                                                                                                                                |
| 13-24             | r <sub>i</sub> | C-C (ring)    | C <sub>1</sub> -C <sub>2</sub> , C <sub>2</sub> -C <sub>4</sub> , C <sub>4</sub> -C <sub>5</sub> , C <sub>5</sub> -C <sub>7</sub> , C <sub>7</sub> -C <sub>9</sub> , C <sub>9</sub> -C <sub>1</sub> , C <sub>19</sub> -C <sub>20</sub> ,<br>C <sub>20</sub> -C <sub>22</sub> , C <sub>22</sub> -C <sub>23</sub> , C <sub>23</sub> -C <sub>25</sub> , C <sub>25</sub> -C <sub>27</sub> , C <sub>27</sub> -C <sub>19</sub> .                                                                                                                                                                                                                                 |
| 25-30             | ri             | C-C (SUB)     | C <sub>1</sub> -C <sub>12</sub> , C <sub>12</sub> -C <sub>14</sub> , C <sub>14</sub> -C <sub>16</sub> , C <sub>19</sub> -C <sub>30</sub> , C <sub>30</sub> -C <sub>32</sub> , C <sub>32</sub> -<br>C <sub>34</sub> .                                                                                                                                                                                                                                                                                                                                                                                                                                       |
| 31-34             | qi             | N-O           | N <sub>11</sub> -O <sub>17</sub> , N <sub>11</sub> -O <sub>18</sub> , N <sub>29</sub> -O <sub>35</sub> , N <sub>29</sub> -O <sub>36</sub>                                                                                                                                                                                                                                                                                                                                                                                                                                                                                                                  |
| 35-38             | Qi             | C-O           | C <sub>16</sub> -O <sub>40</sub> , C <sub>16</sub> -O <sub>41</sub> , C <sub>34</sub> -O <sub>37</sub> , C <sub>34</sub> -O <sub>38</sub>                                                                                                                                                                                                                                                                                                                                                                                                                                                                                                                  |
| 39-40             | Ri             | C-N           | C <sub>4</sub> -N <sub>11</sub> , C <sub>22</sub> -N <sub>29</sub>                                                                                                                                                                                                                                                                                                                                                                                                                                                                                                                                                                                         |
| 41-44             | qi             | O-H           | O <sub>41</sub> -H <sub>42</sub> , O <sub>38</sub> -H <sub>39</sub> , O <sub>40</sub> -H <sub>39</sub> , O <sub>37</sub> -H <sub>42</sub>                                                                                                                                                                                                                                                                                                                                                                                                                                                                                                                  |
| <b>Bending</b>    |                |               |                                                                                                                                                                                                                                                                                                                                                                                                                                                                                                                                                                                                                                                            |
| 45-56             | β <sub>i</sub> | C-C-H (Ring1) | C <sub>1</sub> -C <sub>2</sub> -H <sub>3</sub> , C <sub>4</sub> -C <sub>2</sub> -H <sub>3</sub> , C <sub>4</sub> -C <sub>5</sub> -H <sub>6</sub> , C <sub>7</sub> -C <sub>5</sub> -H <sub>6</sub> ,<br>C <sub>5</sub> -C <sub>7</sub> -H <sub>8</sub> , C <sub>9</sub> -C <sub>7</sub> -H <sub>8</sub> , C <sub>7</sub> -C <sub>9</sub> -H <sub>10</sub> , C <sub>1</sub> -C <sub>9</sub> -H <sub>10</sub> ,<br>C <sub>1</sub> -C <sub>12</sub> -H <sub>13</sub> , C <sub>14</sub> -C <sub>12</sub> -H <sub>13</sub> , C <sub>12</sub> -C <sub>14</sub> -H <sub>15</sub> , C <sub>16</sub> -C <sub>14</sub> -<br>H <sub>15</sub> .                         |
| 57-68             | β <sub>i</sub> | C-C-H (Ring2) | C <sub>19</sub> -C <sub>20</sub> -H <sub>21</sub> , C <sub>22</sub> -C <sub>20</sub> -H <sub>21</sub> , C <sub>22</sub> -C <sub>23</sub> -H <sub>24</sub> , C <sub>25</sub> -C <sub>23</sub> -<br>H <sub>24</sub> , C <sub>23</sub> -C <sub>25</sub> -H <sub>26</sub> , C <sub>27</sub> -C <sub>25</sub> -H <sub>26</sub> , C <sub>25</sub> -C <sub>27</sub> -H <sub>28</sub> , C <sub>19</sub> -<br>C <sub>27</sub> -H <sub>28</sub> , C <sub>19</sub> -C <sub>30</sub> -H <sub>31</sub> , C <sub>32</sub> -C <sub>30</sub> -H <sub>31</sub> , C <sub>30</sub> -C <sub>32</sub> -H <sub>33</sub> ,<br>C <sub>34</sub> -C <sub>32</sub> -H <sub>33</sub> . |
| 69-70             | β <sub>i</sub> | C-O-H         | C <sub>16</sub> -O <sub>41</sub> -H <sub>42</sub> , C <sub>34</sub> -O <sub>38</sub> -H <sub>39</sub>                                                                                                                                                                                                                                                                                                                                                                                                                                                                                                                                                      |
| 71-72             | θ <sub>i</sub> | O-H-O         | O <sub>38</sub> -H <sub>39</sub> -O <sub>40</sub> , O <sub>41</sub> -H <sub>42</sub> -O <sub>37</sub>                                                                                                                                                                                                                                                                                                                                                                                                                                                                                                                                                      |
| 73-76             | α <sub>i</sub> | C-C-C (SUB)   | C <sub>9</sub> -C <sub>1</sub> -C <sub>12</sub> , C <sub>2</sub> -C <sub>1</sub> -C <sub>12</sub> , C <sub>27</sub> -C <sub>19</sub> -C <sub>30</sub> , C <sub>20</sub> -C <sub>19</sub> -C <sub>30</sub> .                                                                                                                                                                                                                                                                                                                                                                                                                                                |
| 77-81             | α <sub>i</sub> | b(C-C-C)      | C <sub>2</sub> -C <sub>1</sub> -C <sub>12</sub> , C <sub>1</sub> -C <sub>12</sub> -C <sub>14</sub> , C <sub>12</sub> -C <sub>14</sub> -C <sub>16</sub> , C <sub>19</sub> -C <sub>30</sub> -C <sub>32</sub> ,<br>C <sub>30</sub> -C <sub>32</sub> -C <sub>34</sub> ,                                                                                                                                                                                                                                                                                                                                                                                        |

|                             |            |               |                                                                                                                                                                                                                                                                                                                                                                                                                               |
|-----------------------------|------------|---------------|-------------------------------------------------------------------------------------------------------------------------------------------------------------------------------------------------------------------------------------------------------------------------------------------------------------------------------------------------------------------------------------------------------------------------------|
| 82-85                       | $\theta_i$ | C-N-O         | C <sub>4</sub> -N <sub>11</sub> -O <sub>17</sub> , C <sub>4</sub> -N <sub>11</sub> -O <sub>18</sub> , C <sub>22</sub> -N <sub>29</sub> -O <sub>35</sub> , C <sub>22</sub> -N <sub>29</sub> -O <sub>36</sub>                                                                                                                                                                                                                   |
| 86-89                       | $\alpha_i$ | C-C-O         | C <sub>14</sub> -C <sub>16</sub> -O <sub>40</sub> , C <sub>14</sub> -C <sub>16</sub> -O <sub>41</sub> , C <sub>32</sub> -C <sub>34</sub> -O <sub>37</sub> , C <sub>32</sub> -C <sub>34</sub> -O <sub>38</sub>                                                                                                                                                                                                                 |
| 90-95                       | $\delta_i$ | C-C-C (Ring1) | C <sub>1</sub> -C <sub>2</sub> -C <sub>4</sub> , C <sub>2</sub> -C <sub>4</sub> -C <sub>5</sub> , C <sub>4</sub> -C <sub>5</sub> -C <sub>7</sub> , C <sub>5</sub> -C <sub>7</sub> -C <sub>9</sub> , C <sub>7</sub> -C <sub>9</sub> -C <sub>1</sub> , C <sub>9</sub> -C <sub>1</sub> -C <sub>2</sub> .                                                                                                                         |
| 96-101                      | $\delta_i$ | C-C-C (Ring2) | C <sub>19</sub> -C <sub>20</sub> -C <sub>22</sub> , C <sub>20</sub> -C <sub>22</sub> -C <sub>23</sub> , C <sub>22</sub> -C <sub>23</sub> -C <sub>25</sub> , C <sub>23</sub> -C <sub>25</sub> -C <sub>27</sub> , C <sub>25</sub> -C <sub>27</sub> -C <sub>19</sub> , C <sub>27</sub> -C <sub>19</sub> -C <sub>20</sub> .                                                                                                       |
| 102-105                     | $\beta_i$  | C-C-N         | C <sub>2</sub> -C <sub>4</sub> -N <sub>11</sub> , C <sub>5</sub> -C <sub>4</sub> -N <sub>11</sub> , C <sub>20</sub> -C <sub>22</sub> -N <sub>29</sub> , C <sub>23</sub> -C <sub>22</sub> -N <sub>29</sub> .                                                                                                                                                                                                                   |
| <b>Out of plane bending</b> |            |               |                                                                                                                                                                                                                                                                                                                                                                                                                               |
| 106-111                     | $\omega_i$ | C-H (Ring1)   | H <sub>3</sub> -C <sub>2</sub> -C <sub>4</sub> -C <sub>1</sub> , H <sub>6</sub> -C <sub>5</sub> -C <sub>7</sub> -C <sub>4</sub> , H <sub>8</sub> -C <sub>7</sub> -C <sub>9</sub> -C <sub>5</sub> , H <sub>10</sub> -C <sub>9</sub> -C <sub>1</sub> -C <sub>7</sub> , H <sub>13</sub> -C <sub>12</sub> -C <sub>14</sub> -C <sub>1</sub> , H <sub>15</sub> -C <sub>14</sub> -C <sub>12</sub> -C <sub>16</sub> .                 |
| 112-117                     | $\omega_i$ | C-H (Ring 2)  | H <sub>21</sub> -C <sub>20</sub> -C <sub>22</sub> -C <sub>19</sub> , H <sub>24</sub> -C <sub>23</sub> -C <sub>25</sub> -C <sub>22</sub> , H <sub>26</sub> -C <sub>25</sub> -C <sub>27</sub> -C <sub>23</sub> , H <sub>28</sub> -C <sub>27</sub> -C <sub>19</sub> -C <sub>25</sub> , H <sub>31</sub> -C <sub>30</sub> -C <sub>32</sub> -C <sub>19</sub> , H <sub>33</sub> -C <sub>32</sub> -C <sub>30</sub> -C <sub>34</sub> . |
| 118-119                     | $\omega_i$ | C-N           | N <sub>11</sub> -C <sub>4</sub> -C <sub>2</sub> -C <sub>5</sub> , N <sub>29</sub> -C <sub>22</sub> -C <sub>23</sub> -C <sub>20</sub> .                                                                                                                                                                                                                                                                                        |
| 120-121                     | $\omega_i$ | N-O           | C <sub>4</sub> -N <sub>11</sub> -O <sub>17</sub> -O <sub>18</sub> , C <sub>22</sub> -N <sub>29</sub> -O <sub>35</sub> -O <sub>36</sub>                                                                                                                                                                                                                                                                                        |
| 122-123                     | $\omega_i$ | C-O           | C <sub>14</sub> -C <sub>16</sub> -O <sub>40</sub> -O <sub>41</sub> , C <sub>32</sub> -C <sub>34</sub> -O <sub>37</sub> -O <sub>38</sub>                                                                                                                                                                                                                                                                                       |
| 124-125                     | $\omega_i$ | C-C (SUB)     | C <sub>12</sub> -C <sub>1</sub> -C <sub>2</sub> -C <sub>9</sub> , C <sub>30</sub> -C <sub>19</sub> -C <sub>20</sub> -C <sub>27</sub>                                                                                                                                                                                                                                                                                          |
| <b>Torsion</b>              |            |               |                                                                                                                                                                                                                                                                                                                                                                                                                               |
| 126-131                     | $\tau_i$   | t(C-C) Ring1  | C <sub>1</sub> -C <sub>2</sub> -C <sub>4</sub> -C <sub>5</sub> , C <sub>2</sub> -C <sub>4</sub> -C <sub>5</sub> -C <sub>7</sub> , C <sub>4</sub> -C <sub>5</sub> -C <sub>7</sub> -C <sub>9</sub> , C <sub>5</sub> -C <sub>7</sub> -C <sub>9</sub> -C <sub>1</sub> , C <sub>7</sub> -C <sub>9</sub> -C <sub>1</sub> -C <sub>2</sub> , C <sub>9</sub> -C <sub>1</sub> -C <sub>2</sub> -C <sub>4</sub> .                         |
| 132-137                     | $\tau_i$   | t(C-C) Ring2  | C <sub>19</sub> -C <sub>20</sub> -C <sub>22</sub> -C <sub>23</sub> , C <sub>20</sub> -C <sub>22</sub> -C <sub>23</sub> -C <sub>25</sub> , C <sub>22</sub> -C <sub>23</sub> -C <sub>25</sub> -C <sub>27</sub> , C <sub>23</sub> -C <sub>25</sub> -C <sub>27</sub> -C <sub>19</sub> , C <sub>25</sub> -C <sub>27</sub> -C <sub>19</sub> -C <sub>20</sub> , C <sub>27</sub> -C <sub>19</sub> -C <sub>20</sub> -C <sub>22</sub> . |
| 138-141                     | $\tau_i$   | t(C-O)        | C <sub>12</sub> -C <sub>14</sub> -C <sub>16</sub> -O <sub>40</sub> , H <sub>15</sub> -C <sub>14</sub> -C <sub>16</sub> -O <sub>41</sub> , C <sub>30</sub> -C <sub>32</sub> -C <sub>34</sub> -O <sub>37</sub> , H <sub>33</sub> -C <sub>32</sub> -C <sub>34</sub> -O <sub>38</sub>                                                                                                                                             |
| 142-145                     | $\tau_i$   | t(N-O)        | C <sub>5</sub> -C <sub>4</sub> -N <sub>11</sub> -O <sub>18</sub> , C <sub>2</sub> -C <sub>4</sub> -N <sub>11</sub> -O <sub>18</sub> , C <sub>20</sub> -C <sub>22</sub> -N <sub>29</sub> -O <sub>36</sub> , C <sub>20</sub> -C <sub>22</sub> -N <sub>29</sub> -O <sub>36</sub> .                                                                                                                                               |
| 146-147                     | $\tau_i$   | t(CCOH)       | C <sub>14</sub> -C <sub>16</sub> -O <sub>41</sub> -H <sub>42</sub> , C <sub>32</sub> -C <sub>34</sub> -O <sub>38</sub> -H <sub>39</sub>                                                                                                                                                                                                                                                                                       |
| 148-153                     | $\tau_i$   | t(CCCC)       | C <sub>9</sub> -C <sub>1</sub> -C <sub>12</sub> -C <sub>14</sub> , C <sub>2</sub> -C <sub>1</sub> -C <sub>12</sub> -C <sub>14</sub> , C <sub>27</sub> -C <sub>19</sub> -C <sub>30</sub> -C <sub>32</sub> ,                                                                                                                                                                                                                    |

|         |          |        |                                                                                                                                    |
|---------|----------|--------|------------------------------------------------------------------------------------------------------------------------------------|
|         |          |        | $C_{20}-C_{19}-C_{30}-C_{32}$ , $C_1-C_{12}-C_{14}-C_{16}$ , $C_{19}-C_{30}-C_{32}-C_{34}$ .                                       |
| 153-156 | $\tau_i$ | t(OHO) | $C_{16}-O_{41}-H_{42}-O_{37}$ , $C_{34}-O_{37}-H_{42}-O_{41}$ ,<br>$C_{16}-O_{40}-H_{39}-O_{38}$ , $C_{34}-O_{38}-H_{39}-O_{40}$ . |

**Table S4: Definition of local symmetry coordinates (much like the natural internal coordinates) and the corresponding force constant (mdyne/A°) with scale factors used**

| No.               | Symbol       | Definition                                                                                                                                                                                                          | Scale factors | Force constant |
|-------------------|--------------|---------------------------------------------------------------------------------------------------------------------------------------------------------------------------------------------------------------------|---------------|----------------|
| <b>Stretching</b> |              |                                                                                                                                                                                                                     |               |                |
| 1-8               | vC-H         | $R_1, R_2, R_3, R_4, R_5, R_6, R_7, R_8$                                                                                                                                                                            | 0.9220        | 5.17           |
| 9-12              | vC-H(SUB)    | $R_9, R_{10}, R_{11}, R_{12}$ .                                                                                                                                                                                     | 0.9220        | 5.17           |
| 13-24             | vC-C         | $r_{13}, r_{14}, r_{15}, r_{16}, r_{17}, r_{18}, r_{19}, r_{20}, r_{21}, r_{22}, r_{23}, r_{24}$ .                                                                                                                  | 0.9110        | 6.29           |
| 25-30             | vC-C(SUB)    | $r_{25}, r_{26}, r_{27}, r_{28}, r_{29}, r_{30}$ .                                                                                                                                                                  | 0.9202        | 5.73           |
| 31-32             | v NO2ss      | $(q_{31}+q_{32})/\sqrt{2}, (q_{33}+q_{34})/\sqrt{2}$                                                                                                                                                                | 0.9532        | 11.42          |
| 33-34             | v NO2as      | $(q_{31}-q_{32})/\sqrt{2}, (q_{33}-q_{34})/\sqrt{2}$                                                                                                                                                                | 0.9532        | 8.79           |
| 35-36             | v CO2ss      | $(Q_{35}+Q_{36})/\sqrt{2}, (Q_{37}+Q_{38})/\sqrt{2}$                                                                                                                                                                | 0.9532        | 10.84          |
| 37-38             | v CO2as      | $(Q_{35}-Q_{36})/\sqrt{2}, (Q_{37}-Q_{38})/\sqrt{2}$                                                                                                                                                                | 0.9212        | 7.91           |
| 39-40             | vCN          | $R_{39}, R_{40}$                                                                                                                                                                                                    | 0.9460        | 3.81           |
| 41-44             | vOH          | $q_{41}, q_{42}, q_{43}, q_{44}$                                                                                                                                                                                    | 0.9220        | 6.02           |
| <b>Bending</b>    |              |                                                                                                                                                                                                                     |               |                |
| 45-50             | bCH (Ring1)  | $(\beta_{45}-\beta_{46})/\sqrt{2}, (\beta_{47}-\beta_{48})/\sqrt{2}, (\beta_{49}-\beta_{50})/\sqrt{2},$<br>$(\beta_{51}-\beta_{52})/\sqrt{2}, (\beta_{53}-\beta_{54})/\sqrt{2}, (\beta_{55}-\beta_{56})/\sqrt{2}$ . | 0.9245        | 0.47           |
| 51-56             | bCH (Ring2)  | $(\beta_{57}-\beta_{58})/\sqrt{2}, (\beta_{59}-\beta_{60})/\sqrt{2}, (\beta_{61}-\beta_{62})/\sqrt{2},$<br>$(\beta_{63}-\beta_{64})/\sqrt{2}, (\beta_{65}-\beta_{66})/\sqrt{2}, (\beta_{67}-\beta_{68})/\sqrt{2}$ . | 0.9245        | 0.47           |
| 57-58             | bCOH         | $\beta_{69}, \beta_{70}$                                                                                                                                                                                            | 0.9561        | 4.84           |
| 59-60             | bOHO         | $\theta_{71}, \theta_{72}$                                                                                                                                                                                          | 0.9561        | 1.67           |
| 61-62             | bCC SUB      | $(\alpha_{73}-\alpha_{74})/\sqrt{2}, (\alpha_{75}-\alpha_{76})/\sqrt{2}$ .                                                                                                                                          | 0.9562        | 0.85           |
| 63-67             | bCCC         | $\alpha_{77}, \alpha_{78}, \alpha_{79}, \alpha_{80}, \alpha_{81}$ .                                                                                                                                                 | 0.9562        | 1.08           |
| 68-69             | bNO2ro       | $(\theta_{82}-\theta_{83})/\sqrt{2}, (\theta_{84}-\theta_{85})/\sqrt{2}$                                                                                                                                            | 0.9561        | 1.32           |
| 70-71             | bNO2tw       | $(\theta_{82}+\theta_{83})/\sqrt{2}, (\theta_{84}+\theta_{85})/\sqrt{2}$                                                                                                                                            | 0.9561        | 4.62           |
| 72-73             | bCO2ro       | $(\alpha_{86}-\alpha_{87})/\sqrt{2}, (\alpha_{88}-\alpha_{89})/\sqrt{2}$                                                                                                                                            | 0.9561        | 1.00           |
| 74-75             | bCO2tw       | $(\alpha_{86}+\alpha_{87})/\sqrt{2}, (\alpha_{88}+\alpha_{89})/\sqrt{2}$                                                                                                                                            | 0.9561        | 7.73           |
| 76                | bRtri(Ring1) | $(\delta_{90}-\delta_{91}+\delta_{92}-\delta_{93}+\delta_{94}-\delta_{95})/\sqrt{6}$                                                                                                                                | 0.9630        | 1.21           |
| 77                | bRtri(Ring2) | $(\delta_{96}-\delta_{97}+\delta_{98}-\delta_{99}+\delta_{100}-\delta_{101})/\sqrt{6}$                                                                                                                              | 0.9630        | 1.21           |

|         |              |                                                                                                                                                                                     |        |       |
|---------|--------------|-------------------------------------------------------------------------------------------------------------------------------------------------------------------------------------|--------|-------|
| 78-79   | bRsym        | $(-\delta_{90}-\delta_{91}+2\delta_{92}-\delta_{93}-\delta_{94}+2\delta_{95})/\sqrt{6}$ , $(-\delta_{96}-\delta_{97}+2\delta_{98}-\delta_{99}+\delta_{100}+2\delta_{101})/\sqrt{6}$ | 0.9630 | 1.24  |
| 80      | bRasy(Ring1) | $(\delta_{90}-\delta_{91}+\delta_{93}-\delta_{94})/2$                                                                                                                               | 0.9630 | 1.22  |
| 81      | bRasy(Ring2) | $(\delta_{96}-\delta_{97}+\delta_{99}-\delta_{100})/2$                                                                                                                              | 0.9630 | 1.22  |
| 82-83   | bCN          | $(\beta_{102}-\beta_{103})/\sqrt{2}$ , $(\beta_{104}-\beta_{105})/\sqrt{2}$                                                                                                         | 0.9561 | 1.19  |
|         |              |                                                                                                                                                                                     |        |       |
|         |              | <b>Out-of-Plane bending (wagging)</b>                                                                                                                                               |        |       |
| 84-89   | gCH(Ring 1)  | $\omega_{106}, \omega_{107}, \omega_{108}, \omega_{109}, \omega_{110}, \omega_{111}$ .                                                                                              | 0.9532 | 0.46  |
| 90-95   | gCH(Ring 2)  | $\omega_{112}, \omega_{113}, \omega_{114}, \omega_{115}, \omega_{116}, \omega_{117}$ .                                                                                              | 0.9532 | 0.46  |
| 96-97   | gCN          | $\omega_{118}, \omega_{119}$ .                                                                                                                                                      | 0.9715 | 0.55  |
| 98-99   | gNO2         | $\omega_{120}, \omega_{121}$ .                                                                                                                                                      | 0.9715 | 0.52  |
| 100-101 | gCO2         | $\omega_{122}, \omega_{123}$ .                                                                                                                                                      | 0.9715 | 0.76  |
| 102-103 | gccsub       | $\omega_{124}, \omega_{125}$ .                                                                                                                                                      | 0.9715 | 0.54  |
|         |              | <b>Torsion</b>                                                                                                                                                                      |        |       |
| 104     | tRtri(Ring1) | $(\tau_{126}-\tau_{127}+\tau_{128}-\tau_{129}+\tau_{130}-\tau_{131})/\sqrt{6}$                                                                                                      | 0.9707 | 3.66  |
| 105     | tRtri(Ring2) | $(\tau_{132}-\tau_{133}+\tau_{134}-\tau_{135}+\tau_{136}-\tau_{137})/\sqrt{6}$                                                                                                      | 0.9707 | 3.66  |
| 106     | tRsym(Ring1) | $(\tau_{126}-\tau_{128}+\tau_{129}-\tau_{131})/2$                                                                                                                                   | 0.9707 | 5.71  |
| 107     | tRsym(Ring2) | $(\tau_{132}-\tau_{134}+\tau_{135}-\tau_{137})/2$                                                                                                                                   | 0.9707 | 5.71  |
| 108-109 | tRasy        | $(-\tau_{132}+2\tau_{133}-\tau_{134}-\tau_{135}+2\tau_{136}-\tau_{137})/\sqrt{6}$ ,<br>$(-\tau_{132}+2\tau_{133}-\tau_{134}-\tau_{135}+2\tau_{136}-\tau_{137})/\sqrt{6}$            | 0.9707 | 12.90 |
| 110-111 | tCO2         | $(\tau_{138}+\tau_{139})/2$ , $(\tau_{140}+\tau_{141})/2$                                                                                                                           | 1.000  | 0.11  |
| 112-113 | tNO2         | $(\tau_{142}+\tau_{143})/2$ , $(\tau_{144}+\tau_{145})/2$                                                                                                                           | 1.000  | 0.07  |
| 114-115 | tCCOH        | $\tau_{146}, \tau_{147}$ .                                                                                                                                                          | 1.000  | 0.335 |
| 116-119 | tCCCC        | $(\tau_{148}+\tau_{149})/2$ , $(\tau_{150}+\tau_{151})/2$ , $\tau_{152}, \tau_{153}$                                                                                                | 1.000  | 0.28  |
| 120-121 | tOHO         | $(\tau_{153}+\tau_{154})/2$ , $(\tau_{155}+\tau_{156})/2$                                                                                                                           | 1.000  | 0.85  |

**Table S5: Detailed vibrational assignment of 3NCA dimer by normal mode analysis based on SQM force field calculations**

| Experimental wavenumbers (cm <sup>-1</sup> ) |       | Scaled wavenumbers (cm <sup>-1</sup> ) | <sup>a</sup> IR intensity | <sup>b</sup> Raman intensity | <sup>c</sup> Characterization of normal modes with PED (%)      |
|----------------------------------------------|-------|----------------------------------------|---------------------------|------------------------------|-----------------------------------------------------------------|
| IR                                           | Raman |                                        |                           |                              |                                                                 |
|                                              |       | 3103                                   | 0.0020                    | 2.42                         | 2 VCH (99)                                                      |
|                                              |       | 3066                                   | 0.0032                    | 3.19                         | 13VCH (99)                                                      |
|                                              |       | 3049                                   | 0.0025                    | 1.43                         | VCH (99)                                                        |
|                                              |       | 3049                                   | 0.0025                    | 1.43                         | VCH (99)                                                        |
|                                              |       | 3033                                   | 0.0022                    | 0.844                        | VCH (99)                                                        |
|                                              |       | 1618                                   | 0.0689                    | 78.2                         | vNO <sub>2</sub> as ( 59), VCC ( 14), bNO <sub>2</sub> ro ( 10) |
|                                              |       | 1615                                   | 0.0899                    | 100                          | bCOH ( 41), VCCSUB ( 17), bOHO ( 16), vCO <sub>2</sub> as ( 10) |
|                                              |       | 1611                                   | 0.1170                    | 61.2                         | VCCSUB ( 58), bCH ( 12), bCOH ( 11)                             |
|                                              |       | 1454                                   | 0.00299                   | 22.3                         | bCOH ( 43), bOHO (39), vCO <sub>2</sub> as ( 11)                |
|                                              |       | 1440                                   | 0.0208                    | 3.72                         | bCOH ( 29), bOHO ( 19), bCH ( 19), VCC                          |
|                                              |       | 1435                                   | 0.0142                    | 3.27                         | bCH ( 35), VCC ( 30), bCOH ( 12), bOHO                          |
| 1308 s                                       | 1305  | 1313                                   | 0.0489                    | 3.14                         | bCOH ( 28), bOHO ( 28), vCO <sub>2</sub> ss ( 12)               |
|                                              |       | 1294                                   | 0.0182                    | 1.90                         | 14 VCC (58), bCH ( 10)                                          |
|                                              |       | 1268                                   | 0.00418                   | 0.706                        | 3 bCH ( 61), VCCSUB ( 18)                                       |
|                                              |       | 1226                                   | 0.00568                   | 2.07                         | 9b bCH ( 67)                                                    |
|                                              |       | 1192                                   | 0.0255                    | 58.9                         | bCH ( 27), VCCSUB ( 21), vCO <sub>2</sub> ss ( 10),             |
|                                              |       | 1154                                   | 0.00092                   | 5.46                         | bCH (66), VCC (14)                                              |
|                                              |       | 1153                                   | 0.00090                   | 5.51                         | bCH (66), VCC ( 14)                                             |
| 1109 m                                       | 1110  | 1123                                   | 0.00081                   | 0.811                        | 18a bCH ( 80), VCC ( 18)                                        |

|        |        |      |          |       |                                                            |
|--------|--------|------|----------|-------|------------------------------------------------------------|
|        |        | 1123 | 0.00081  | 0.811 | 18a bCH (80), VCC (18)                                     |
| 1076   |        | 1055 | 0.00778  | 2.53  | VCC (41), bCH (36), VCN (13)                               |
|        |        | 1055 | 0.00778  | 2.53  | VCC (41), bCH (37), VCN (13)                               |
|        |        | 1041 | 0.0107   | 0.842 | bCH (46), VCC (38), VCN (10)                               |
|        |        | 1041 | 0.0107   | 0.842 | bCH (46), VCC (38), VCN (10)                               |
|        |        | 1019 | 0.0148   | 0.759 | gcH (89)                                                   |
|        |        | 1019 | 0.0148   | 0.759 | gcH (52), tRtri (30), tRasy (13)                           |
|        |        | 1014 | 0.0234   | 0.578 | tCCOH (66), bOHO (30)                                      |
| 1001 w | 1001 s | 1000 | 0.00328  | 0.613 | gcH (85), tRtri (11)                                       |
|        |        | 1000 | 0.00328  | 0.613 | tRtri (47), tRsym (30), gcH (22)                           |
| 973 w  |        | 968  | 0.00091  | 13.4  | bRtri (64), VCC (32)                                       |
|        |        | 968  | 0.00091  | 13.4  | bRtri (64), VCC (32)                                       |
|        |        | 950  | 0.00414  | 5.10  | VCCSUB (35), vCO2ss (16), bCCC (15), bOHO (15)             |
| 935 m  |        | 948  | 0.00370  | 5.54  | VCCSUB (42), bCCC (17), vCO2ss (13)                        |
|        |        | 932  | 0.000729 | 1.50  | tRasy (59), tRtri (23), tRsym (10)                         |
|        |        | 910  | 0.00187  | 2.25  | VCC (22), VCN (20), VCCSUB (16),                           |
|        | 909    | 910  | 0.00187  | 2.25  | VCC (22), VCN (20), VCCSUB (15),                           |
|        |        | 891  | 0.00304  | 2.55  | gcH (83), gCO2 (12)                                        |
|        |        | 816  | 0.0115   | 1.02  | tRasy (53), tRtri (33), gcH (10)                           |
|        |        | 812  | 0.0137   | 1.03  | bNO2tw(55), VCC(10), bRtri(10)                             |
|        |        | 742  | 0.00268  | 0.427 | tRtri (31), tRasy (20), gNO2 (18), gCO2 (12)               |
|        |        | 714  | 0.004780 | 0.289 | tRasy (36), tRtri (32), gCO2 (11)                          |
|        |        | 682  | 0.000779 | 1.23  | bCO2tw (38), bOHO (12), bRasy (12)                         |
|        |        | 669  | 0.00189  | 0.478 | tRtri (54), tRasy (45)                                     |
|        |        | 655  | 0.00313  | 1.54  | bRasy (42), bCO2tw (19)                                    |
| 596 m  |        | 649  | 0.00149  | 3.30  | bCO2tw (33), bRasy (29), bOHO (11)                         |
|        |        | 573  | 0.00226  | 0.405 | bRsym (39), bCO2tw (20), bOHO (16)                         |
| 568 m  |        | 572  | 0.00219  | 0.428 | bRsym (39), bCO2tw (23)                                    |
|        |        | 544  | 0.00825  | 0.210 | bCO2ro (22), bNO2ro (14), vOH (12), bOHO (12), bCCsub (10) |

|       |        |     |          |       |                                                     |
|-------|--------|-----|----------|-------|-----------------------------------------------------|
|       |        | 522 | 0.00174  | 0.633 | tRsym ( 25), tRtri ( 22), tRasy ( 17), gccsub       |
|       |        | 521 | 0.00179  | 0.597 | tRsym ( 34), tRtri ( 28), tRasy ( 11), gccsub ( 11) |
|       |        | 500 | 0.0108   | 0.397 | bNO2ro ( 37), bCO2ro ( 13), vOH ( 11), bCN ( 10)    |
| 487 m |        | 489 | 0.00199  | 1.65  | bNO2ro ( 29), bCO2ro ( 26), bCCC ( 17)              |
| 425 w | 403 vw | 428 | 0.000240 | 0.180 | tRsym ( 58), gCN ( 21)                              |
|       |        | 424 | 0.000253 | 0.185 | tRasy (53), tRsym ( 46)                             |
| 405 w |        | 385 | 0.00566  | 0.766 | VCN ( 19), bRasy (19), vOH (16), boHO (10)          |
|       |        | 379 | 0.00263  | 1.78  | VCN ( 38), bRasy ( 27)                              |
|       |        | 361 | 0.00521  | 0.509 | vOH ( 21), bCCsub ( 17), boHO (15)                  |
|       | 333 vw | 345 | 0.000570 | 2.96  | vOH ( 25), bCCsub (15), bCO2ro (14), VCCSUB (12)    |
|       |        | 291 | 0.000154 | 7.91  | vOH ( 52), bCCC (11)                                |
|       | 288 w  | 287 | 0.000191 | 6.25  | tRasy (44), tRsym ( 40)                             |
|       | 275 w  | 285 | 0.000204 | 4.74  | tRasy ( 45), tRsym ( 43)                            |
|       |        | 255 | 0.00126  | 0.449 | VCCSUB ( 22), bCCC (21), bCN (17), bRsym (13)       |
|       |        | 240 | 0.00424  | 0.509 | vOH ( 41), bCN (18), bCCC (15), boHO (12)           |
|       | 225 w  | 224 | 0.000427 | 1.63  | bCOH ( 34), boHO ( 29), bCN ( 16), bCCC ( 11)       |
|       | 187 m  | 186 | 0.000101 | 3.00  | tRasy ( 36), toHO ( 14), tCCCC ( 13), tRsym ( 10)   |
|       |        | 175 | 0.000229 | 4.47  | tRasy ( 58), tRsym ( 21)                            |
|       |        | 167 | 0.000121 | 13.7  | tRasy ( 53), tRsym ( 23)                            |
|       |        | 161 | 0.00011  | 8.66  | tCO2 (28), toHO ( 19), tCCCC ( 12), tRasy ( 11)     |
|       |        | 153 | 0.00007  | 11.8  | bCOH ( 37), vOH ( 35), boHO ( 17)                   |
|       |        | 110 | 0.000574 | 3.46  | tRasy ( 25), toHO ( 12), tRtri ( 11), tCCOH ( 11)   |



|  |  |     |          |      |                                                            |
|--|--|-----|----------|------|------------------------------------------------------------|
|  |  | 104 | 0.00147  | 2.57 | vOH ( 33), bCCsub (22), bOHO (11)                          |
|  |  | 93  | 0.000347 | 2.83 | tCCCC( 29), gcH (14), tRasy ( 13), tOHO (12), gccsub ( 10) |
|  |  | 74  | 0.000152 | 9.83 | vOH ( 59), bOHO (11)                                       |
|  |  | 68  | 0.000244 | 10.4 | tOHO (89)                                                  |
|  |  | 60  | 0.000101 | 18.8 | tRsym ( 31), tRasy ( 25), tNO2 (18)                        |
|  |  | 49  | 0.000085 | 44.4 | tRasy ( 35), tRsym ( 31), tNO2( 13), tOHO (13)             |
|  |  | 44  | 0.000064 | 10.2 | bCCC ( 38), bCOH (21), bCCsub (14), bOHO ( 10)             |
|  |  | 38  | 0.000052 | 25.1 | tRasy ( 27), tCCCC (20), tRsym ( 19)                       |
|  |  | 34  | 0.000052 | 18.4 | tCCCC (49), tRsym (10), tCCOH (10)                         |
|  |  | 18  | 0.00015  | 17.5 | bCCC ( 40), vOH ( 30), bCO2ro (13)                         |
|  |  | 9   | 0.00042  | 8.67 | tOHO ( 57), tCCCC ( 17)                                    |
|  |  | 8   | 0.00042  | 8.11 | tOHO (31), tCCOH (26), tCCCC (19)                          |

<sup>a</sup>Calculated IR intensities.

<sup>b</sup>Relative Raman intensities calculated by Eq. (1) and normalized to 100.

<sup>c</sup>Only PED contributions >10% are listed.

Abbreviations: vs – very strong, s – strong, m – medium, w – weak, vw – very weak, br- broad, sh- shoulder, v – stretching, ss – symmetric stretching, as- asymmetric stretching, R- phenyl ring, b-bending, asy- asymmetric deformation, tri- trigonal deformation, b-inplane bending, t- torsion, g- out of plane bending, W- wagging, bRtri- trigonal ring in-plane bending, bRasy- asymmetric ring in-plane bending, bRsym- symmetric ring in-plane bending, tRtri- trigonal ring torsion, tRasy- asymmetric ring torsion, tRsym- symmetric ring torsion.
